# 1 Electron cryo-tomography of vestibular hair-cell stereocilia

2 Zoltan Metlagel<sup>1,\*</sup>, Jocelyn F. Krey<sup>2</sup>, Junha Song<sup>1</sup>, Mark F. Swift<sup>3</sup>, William J. Tivol<sup>1</sup>, Rachel A. Dumont<sup>2</sup>,  
3 Jasmine Thai<sup>1</sup>, Alex Chang<sup>1</sup>, Helia Seifikar<sup>1</sup>, Niels Volkmann<sup>3</sup>, Dorit Hanein<sup>3</sup>, Peter G. Barr-Gillespie<sup>2,†</sup>,  
4 and Manfred Auer<sup>1,†,‡</sup>

5 <sup>1</sup>Molecular Biophysics and Integrated Bioimaging Division, Lawrence Berkeley National Laboratory,  
6 Berkeley, California, USA

7 <sup>2</sup>Oregon Hearing Research Center & Vollum Institute, Oregon Health & Science University, Portland,  
8 Oregon, USA

9 <sup>3</sup>Immunity and Pathogenesis Program, Burnham Prebys Medical Discovery Institute, San Diego, USA

10 \*Present address: FEI Company, 5350 NE Dawson Creek Drive, Hillsboro, OR 97124, USA

11 †Co-senior authors

12 ‡Corresponding author: Manfred Auer  
13 [mauer@lbl.gov](mailto:mauer@lbl.gov)  
14 1 Cyclotron Road, MS Donner, Berkeley, CA 94720  
15 Telephone number: 510-457-5233  
16 Fax number: 510-457-6488

17

## 18 **Abstract**

19 High-resolution imaging of hair-cell stereocilia of the inner ear has contributed substantially to our  
20 understanding of auditory and vestibular function. To provide three-dimensional views of the structure of  
21 stereocilia cytoskeleton and membranes, we developed a method for rapidly freezing unfixed stereocilia  
22 on electron microscopy grids, which allowed subsequent 3D imaging by electron cryo-tomography.  
23 Structures of stereocilia tips, shafts, and tapers were revealed, demonstrating that the actin paracrystal  
24 was not perfectly ordered. This sample-preparation and imaging procedure will allow for examination of  
25 structural features of stereocilia in a near-native state.

## 26 **Keywords**

27 Hair cells; stereocilia; cryo-electron microscopy; actin

## 28 **Introduction**

29 Hair cells of the inner ear detect minute forces arising from sound and head movements (Fettiplace and  
30 Kim, 2014). The mechanically sensitive structure of a hair cell is its hair bundle, an apical protrusion of  
31 ~100 actin-filled stereocilia (Roberts et al., 1988; Gillespie and Müller, 2009). Each stereocilium contains  
32 hundreds of actin filaments along most of its length, but that number dwindles near the base, where only  
33 a few dozen enter the cell. Stereocilia are arranged in a bundle in a highly patterned way, with a gradient  
34 of stereocilia height dictating the axis of mechanical sensitivity of the bundle. Stereocilia are connected  
35 together by a variety of links, with the tip link being of greatest interest. Tip links connect a stereocilium  
36 at its tip to the side of its tallest neighbor, and are aligned along the axis of sensitivity; tension in tip links  
37 opens transduction channels, the final step in the mechanical-to-electrical transduction that underlies  
38 auditory and vestibular function (Fettiplace and Kim, 2014).

39 Because of their highly regular structure, stereocilia are unusually amenable to investigation with  
40 ultrastructural imaging (Jacobs and Hudspeth, 1990; Hackney et al., 1993). Stereocilia structure usually  
41 is examined by transmission electron microscopy (TEM<sup>§</sup>) of resin-embedded samples, with most samples  
42 having been chemically fixed, stained with heavy metals, dehydrated with alcohols, and embedded in  
43 resin prior to ultrathin sectioning. Each of those processing steps introduces the possibility of artifacts.  
44 An alternative to this approach is rapid-freeze, deep-etch imaging, where fixed or unfixed material is  
45 plunge-frozen and fractured, followed by etching to remove ice and observation in TEM (Hirokawa and  
46 Tilney, 1982; Hirokawa, 1986; Kachar et al., 2000). Coating with metal is required to obtain sufficient  
47 contrast, however, so freeze-etching still does not reveal native structure of the stereocilia cytoskeleton.  
48 Ultrarapid cryo-fixation of sensory epithelium improves preservation, but cannot fully eliminate possible  
49 sample artifacts—e.g., molecular aggregation and extraction—arising from heavy metal staining,  
50 dehydration and resin-infiltration protocols. Furthermore, stereocilia are ideally examined in a longitudinal  
51 or cross-sectional orientation, but samples are usually obtained in a slanted orientation, complicating  
52 ultrathin sectioning.

53 Electron cryo-tomography (cryo-ET) has emerged as a powerful method for examining macromolecular  
54 structures in cells (Baker et al., 2017; Oikonomou and Jensen, 2017; Hutchings and Zanetti, 2018).  
55 Samples frozen by rapid-freezing or high-pressure-freezing techniques retain their native structure, and  
56 tomography allows reconstruction of 3D structures within a slab of tissue. Cryo-ET is particularly useful

---

<sup>§</sup> Nonstandard abbreviations: cryo-ET, electron cryo-tomography; SEM, scanning electron microscopy; TEM, transmission electron microscopy; WT, wild type.

57 for examination of native cytoskeletal structure (Jasnin et al., 2013; Turgay et al., 2017; McIntosh et al.,  
58 2018; Sun et al., 2018). We adapted stereocilia blotting methods (Neugebauer and Thurm, 1984;  
59 Shepherd et al., 1989; Hasson et al., 1997; Avenarius et al., 2017) to isolate a thin layer of stereocilia on  
60 electron microscopy grids. Stereocilia on grids were then plunge-frozen and imaged with cryo-ET. The  
61 resulting tomograms revealed key features of native stereocilia, including substantial imperfections in the  
62 paracrystalline arrangement of actin filaments in the stereocilia cytoskeletal core.

## 63 **Materials and Methods**

### 64 **Preparation of electron microscopy grids**

65 Tissue was blotted on lacey carbon film on 200-300 mesh gold or copper grids (Electron Microscopy  
66 Sciences). Grids were glow-discharged in a PELCO easyGlow 91000 (Ted Pella), and 15 nm gold  
67 fiducials (Sigma-Aldrich) were added at 1:4-1:10 dilution. Prior to dissection, grids were incubated with a  
68 5  $\mu$ l drop of 1 mg/ml poly-L-lysine on the sample side at room temperature, and the grids were covered  
69 to minimize evaporation; after at least 20 min, the poly-L-lysine solution was blotted off, and grids were  
70 allowed to dry for 2 hr. Coated grids could be stored for 2 days before use. Grids were glow-discharged  
71 again 30 min prior to blotting.

### 72 **Isolation of stereocilia on grids**

73 Stereocilia isolation was similar to that previously reported (Neugebauer and Thurm, 1984). For wild-type  
74 C57BL/6 (WT) or plastin 1 knockout (*Pls1<sup>-/-</sup>*) mice, utricles were dissected from P21-P28 animals in  
75 Leibovitz L-15 media supplemented with 5 mM HEPES; otoconia were removed using an eyelash.  
76 Bullfrog sacculi were prepared for stereocilia blotting essentially as described (Shepherd et al., 1990).  
77 For mice or bullfrogs, organs were washed by transferring to a new dish of dissection buffer. To avoid  
78 disturbing the poly-L-lysine coating, the grid with its coated side up was placed into the dish by angling  
79 the edge of grid into the meniscus. The organ was then placed with the epithelium side down onto the  
80 center of the grid; gentle pressure was applied to the back of the organ with forceps in order to flatten it  
81 against the grid. The organ was then peeled away, leaving stereocilia attached to the grid.

### 82 **Plunge-freezing**

83 After removing the tissue from the grid, the grid was carefully removed from the solution using an anti-  
84 capillary forceps and transferred to the manual plunger or Vitrobot. The remaining solution on the grid  
85 was then quickly blotted away by placing a small piece of filter paper at the edge of the grid interface with  
86 the forceps, and allowing most of the remaining solution on the grid and in between the forceps blades  
87 to wick away. A small aliquot of saline (4  $\mu$ l) was added back, then manual blotting was carried out with  
88 Whatman #1 filter paper for 5-10 sec. The second blotting step allowed for better control of ice thickness,  
89 as the amount of solution left on the grids after dissection was highly variable and distinguishable by eye.

90 Grids were plunge-frozen immediately after stereocilia isolation, and as quickly as possible after inner-  
91 ear dissection. Although most plunging was done on a home-made manual plunger (Lawrence Berkeley  
92 National Lab) (Comolli et al., 2012), a Vitrobot (ThermoFisher) was also used with similar success. When  
93 plunging was done in the Vitrobot, humidity was set to 70%, and the chamber was allowed to equilibrate  
94 20-30 sec prior to loading the grid. The chamber door was left open and the humidifier was turned off  
95 during the majority of the dissection to prevent the filter paper becoming soggy and losing its ability to  
96 wick away solution. Grids were then stored under liquid nitrogen until imaging in the electron microscope.

### 97 **Electron cryo-tomography**

98 Single-axis tilt series were generally collected to the full range allowed by the goniometer before the grid  
99 bar came into view, typically from  $\pm 60^\circ$  to  $65^\circ$  in  $1.5\text{-}2^\circ$  increments. Low-dose conditions were used  
100 (total dose of  $80\text{-}100$  electrons/ $\text{\AA}^2$ ) on a Krios TEM (ThermoFisher) operated at 300 kV with a nominal  
101 defocus of  $-3.5$  to  $-4.5$   $\mu\text{m}$ . Images were recorded on a Falcon 2 camera in integration mode at a pixel  
102 size of  $0.47$  to  $0.59$  nm. Reconstruction of all tomograms was done with IMOD (Kremer et al., 1996),  
103 using the gold fiducials for tilt series alignment and either weighted back-projection reconstructions or the  
104 SIRT reconstruction method provided by Tomo3D (Agulleiro and Fernandez, 2011). No obvious  
105 differences were observed between the two reconstruction methods. Cryo-tomograms were binned by 2  
106 for reconstruction. Fiducials that were visible through the entire tilt series (typically 5-15) were selected  
107 by hand, and tracking of individual markers was checked and adjusted manually as necessary. Fiducials  
108 that could not be tracked accurately throughout the tilt series were ignored. The aligned tilt series was  
109 reconstructed with Tomo3d using the simultaneous iterative reconstruction technique (SIRT) (Agulleiro  
110 and Fernandez, 2011). The resulting tomograms were filtered with Priism (Chen et al., 1992), using five  
111 iterations (median) of the bilateral or median filters with a kernel size of 3 to improve contrast.

## 112 **Results**

### 113 **Cryo-preservation of individual whole-mount stereocilia**

114 Most previous two- and three-dimensional studies of hair-cell stereocilia using TEM have relied on  
115 ultrathin sections of resin-embedded tissue samples. Despite improved preservation due to high-pressure  
116 freezing and freeze-substitution, 3D tomographic imaging of the actin paracrystal in stereocilia (Shin et  
117 al., 2013) indicated that actin filaments and actin-actin crosslinkers were irregularly arranged throughout  
118 the imaged region. The ultrastructure of resin-embedded samples may have been compromised,  
119 however, by the addition of cryo-protectants prior to high-pressure freezing or by the lengthy freeze-  
120 substitution, resin-infiltration, embedding, and polymerization steps. We therefore sought to develop an  
121 alternative sample-preparation approach, preferably resulting in stereocilia samples that could be studied  
122 in an unstained, frozen-hydrated (vitrified) state by cryo-electron tomography, and that were therefore as  
123 close as possible to their native structure.

124 Building on a stereocilia blotting technique reported previously (Neugebauer and Thurm, 1984), we

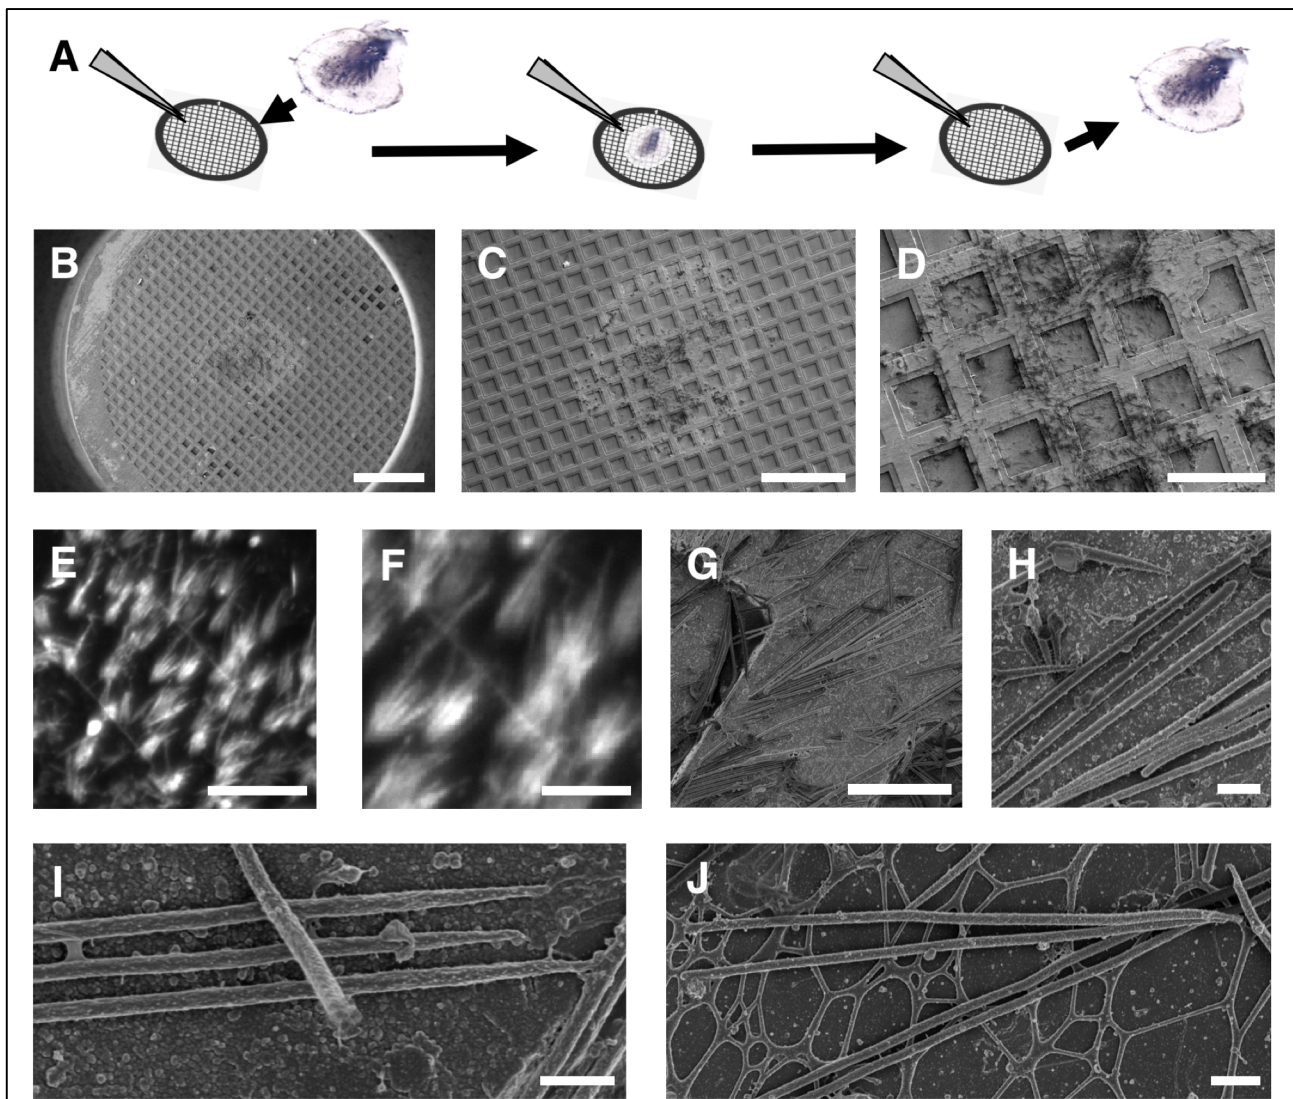

Figure 1. **Stereocilia blotting from tissue surface onto electron microscopy support film.** (A) Schematic view of stereocilia blotting. Sensory epithelia are brought briefly into contact with the electron microscopy support film in dissection buffer solution, resulting in the transfer of hair bundles and stereocilia onto the EM grid support film. (B) Overview of the entire electron microscope grid imaged by SEM. Note the imprint of the tissue at the center. Scale bar = 500  $\mu\text{m}$ . (C-D) Close-up views of the center region of the grid imaged by SEM. Scale bars = 300  $\mu\text{m}$  (C) and 100  $\mu\text{m}$  (D). (E-F) Hair bundles labeled with Alexa 568-phalloidin. Scale bars = 50  $\mu\text{m}$  (E) and 20  $\mu\text{m}$  (F). (G-H) Low and intermediate resolution SEM images of stereocilia blotted into the grid bars. Scale bars = 10  $\mu\text{m}$  (G) and 1  $\mu\text{m}$  (H). (I) Higher resolution imaging of three adjacent stereocilia blotted onto an EM grid. Note that another stereocilium lays on top of the three-stereocilia monolayer. Scale bar = 1  $\mu\text{m}$ . (J) Four stereocilia deposited onto the support film spanning the grid squares. Note that some stereocilia appear straight, whereas others show significant deviations from the original straight rod shape. Scale bar = 1  $\mu\text{m}$ .

125 captured intact stereocilia onto an electron microscopy grid by bringing a freshly dissected sensory  
126 epithelium in the dissection buffer in contact with the grid and its lacey-carbon support film, which had  
127 been coated with poly-L-lysine. The epithelium was removed, leaving stereocilia adhering to the grid.  
128 Grids were removed from the solution, dissection buffer was wicked away, and samples were either  
129 chemically fixed (Fig. 1A) or plunge-frozen in liquid ethane (Figs. 2-4).

130 We first characterized the isolation procedure by using scanning electron microscopy (SEM) to examine  
131 chemically fixed stereocilia on blotted grids. Stereocilia are shown in Fig. 1B-D at increasing  
132 magnification, with the ~1 mm imprint of the epithelium being readily visible in low-power views (Fig. 1B-  
133 C). Stereocilia were found scattered across the grid's support film (Fig. 1D-J). Epifluorescence light  
134 microscopy of Alexa 568-phalloidin labeled stereocilia revealed a splayed, hair-bundle-like organization  
135 of stereocilia (Fig. 1E-F). High-magnification SEM imaging showed the stereocilia in more detail (Fig. 1G-  
136 J). In many cases, parallel stereocilia in close proximity formed a single layer (Fig. 1H-J), although two  
137 or more layers were often found (Fig. 1I). Most stereocilia appeared straight along their entire length and  
138 showed readily distinguishable tip and taper regions on either end of the shaft region. Other stereocilia  
139 showed significant deviations from linearity, which suggested physical damage to the stereocilia. Only  
140 well-preserved, straight stereocilia were used for actin-core analysis.

#### 141 **Electron cryo-tomography of stereocilia**

142 Using vitrified samples, we collected single-axis tomographic tilt series of young adult mouse utricle (Fig.  
143 2A-H,K-L) and adult bullfrog saccule stereocilia (Fig. 2I-J). Mouse utricle samples included those  
144 dissected from plastin 1 knockout mutants (*Pls1<sup>-/-</sup>*), which in contrast to WT utricles, have hexagonally-  
145 packed actin filaments in their stereocilia (Krey et al., 2016). Low-dose projection images at zero-degree  
146 tilt are shown for WT (Fig. 2A) and *Pls1<sup>-/-</sup>* (Fig. 2D) mouse stereocilia. Central sections through the  
147 corresponding 3D reconstructions are shown in longitudinal (Fig. 2B,E) and cross-sectional (Fig. 2C,F)  
148 orientations at positions indicated by two black parallel lines. Longitudinal views are single slices of ~1 nm  
149 thickness, whereas each cross-section view represents an average projection of a ~50 nm slab.  
150 Additional reconstructions of tip and shaft regions of WT mouse (longitudinal view in Fig. 2G) and bullfrog  
151 (Fig. 2I) stereocilia, as well as taper and rootlet regions of *Pls1<sup>-/-</sup>* mouse stereocilia (Fig. 2K), are shown  
152 in the corresponding cross-sectional views (Fig. 2H,J,L). Shaft regions of mouse stereocilia were typically  
153 ~250 nm; bullfrog stereocilia shafts were 175-300 nm. Larger stereocilia diameter, thick vitrified ice and  
154 crystalline ice contaminations (Fig. 2A) are not ideal for tomographic in-depth analysis and lead to low  
155 feature contrast in 3D reconstructed volumes, as can be seen when comparing Fig. 2B with Fig. 2G. We  
156 focused our study on samples from the mouse utricle. In order to assess actin-filament organization, we  
157 calculated 50 nm cross-sectional averages (Fig. 2C,F,H,J,L). When viewed in cross section, most  
158 stereocilia appeared round, although stereocilia occasionally appeared flattened with the number of actin  
159 filaments parallel to the grid surface being significantly higher than the number of actin filaments  
160 perpendicular.

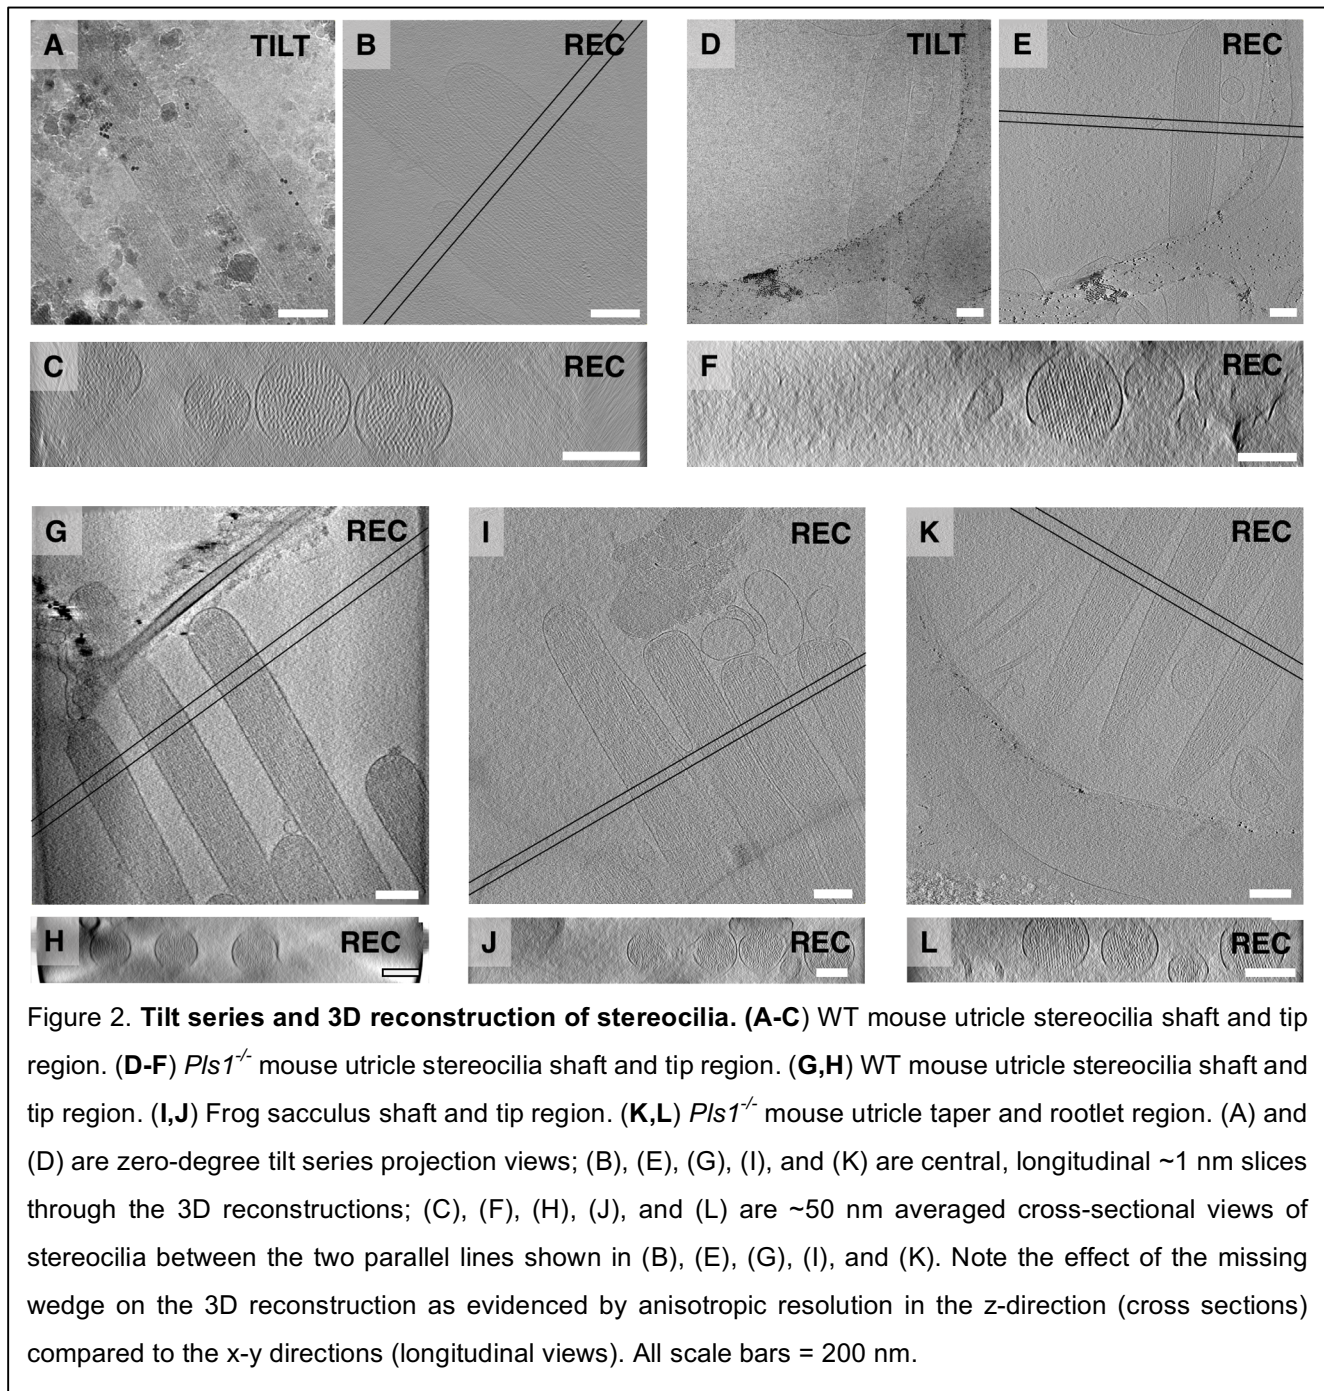

161

162 Actin paracrystals appeared better ordered in the *Pls1*<sup>-/-</sup> data compared to those in WT data, in agreement  
163 with results from resin-embedded samples (Krey et al., 2016). We measured stereocilia diameters from  
164 3D reconstructions, which allow us to confirm that stereocilia were not flattened. We had a larger dataset  
165 of *Pls1*<sup>-/-</sup> stereocilia, which averaged  $286 \pm 49$  nm (mean  $\pm$  SD; n=21). Eight WT stereocilia had a diameter  
166 of  $228 \pm 45$  nm (p=0.008). While this result was unexpected, as extensive characterization of *Pls1*<sup>-/-</sup>  
167 stereocilia showed that they had a reduced diameter as compared to WT (Krey et al., 2016), the sample

168 size was very small. Due to the missing wedge artifact, actin and membrane signals were strongest in  
169 the center and faded towards the top and the bottom of the tomographic reconstructions. We found a  
170 continuous membrane seal around the end of the taper region (Fig. 2K) at the site where stereocilia had  
171 been anchored in the cuticular plate prior to blotting of the hair bundles, similar to that shown previously  
172 with a different stereocilia isolation procedure (Gillespie and Hudspeth, 1991).

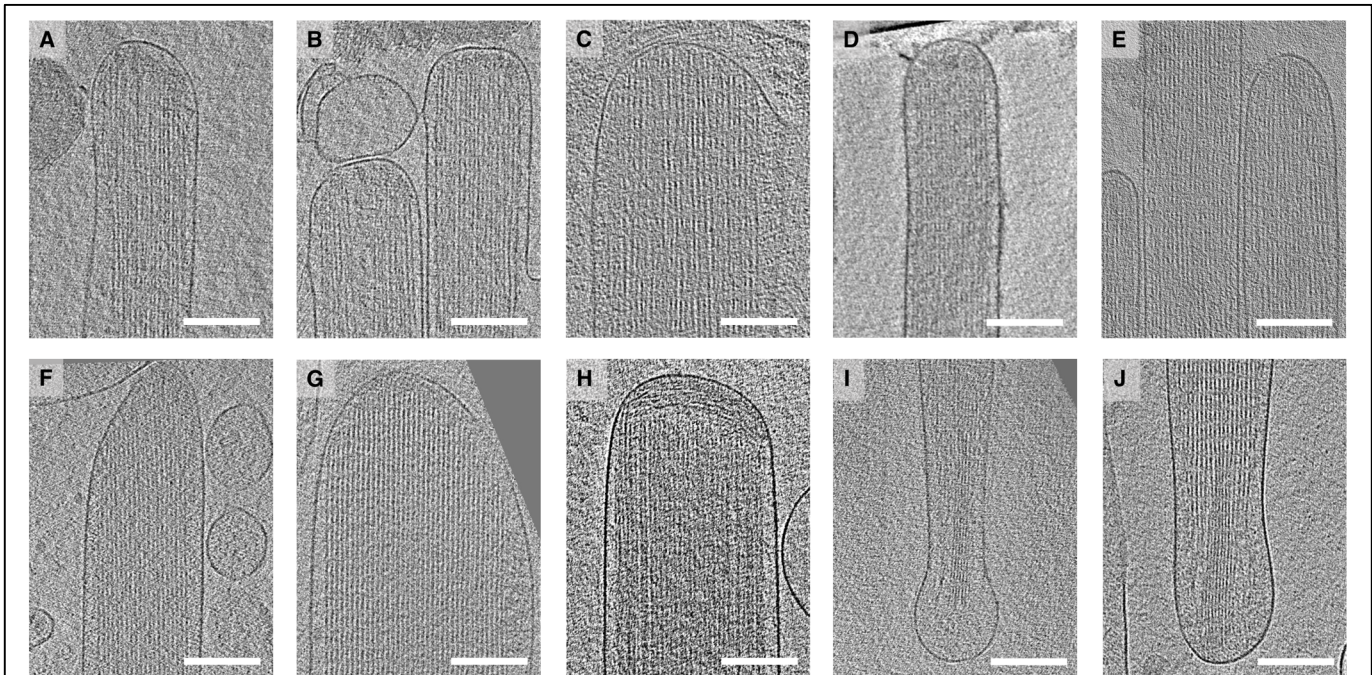

Figure 3. **Tomograms of tip, shaft, and taper stereocilia regions.** (A-B) Central slice through stereocilia tip region of frog sacculus. (C-E) Central slice through stereocilia tip region of wildtype mouse utricle. (F-H) Central slice through stereocilia shaft region of *Pls1*<sup>-/-</sup> mouse utricle; note the presence of filamentous material near the tip in distinctly different orientation. (I-J) central slice through taper region of stereocilia from a *Pls1*<sup>-/-</sup> mouse utricle. All scale bars = 200 nm.

173

### 174 **Cryo-tomograms of tip, shaft, and taper regions**

175 As shown in Fig. 3, we calculated 10 nm thin slab averages, corresponding to a single layer of actin  
176 filaments, of tip and shaft regions (Fig. 3A-H) and taper/rootlet region (Fig. 3I,J). Tips of bullfrog stereocilia  
177 were either rounded (Fig. 3A) or flattened (Fig. 3B), consistent with previous studies with resin-embedded  
178 samples (Jacobs and Hudspeth, 1990). Fig. 3C-E constitute mouse WT and Fig. 3F-J constitute *Pls1*<sup>-/-</sup>  
179 tip/shaft and taper region data sets, respectively. For mouse samples, we found the tips to be mostly  
180 round, however, on occasion, we found a cone-shaped structure (Fig. 3F). For most data sets, actin  
181 filaments could be traced to the immediate vicinity of the tip membrane with a small gap of ~10-15 nm,  
182 except for one data set where we found a ~100 nm thin layer of what appears to be filamentous material  
183 oriented perpendicular to the actin bundle axis (Fig. 3H). In the shaft region, the actin filaments appeared



184 well organized, with a smooth membrane in close proximity to the actin core (Fig. 3G-H). Occasionally  
185 the plasma membrane appeared detached from the actin core (Fig. 3C).

186 In the taper region (Fig. 3I-J), actin filaments appeared to continue from the shaft region into the taper  
187 and rootlet regions. Interestingly, while the rootlet region in osmicated resin-embedded samples typically  
188 appeared considerably darker due to osmium binding (Furness et al., 2008), filaments did not appear  
189 notably different from that of the shaft region in our tomograms, although the filament packing appeared  
190 to be tighter (e.g., Fig. 3J). Individual filaments were readily distinguishable throughout the entire region.

191 The actin-actin spacing in these cryopreserved stereocilia was considerably larger than in conventionally  
192 processed samples (Krey et al., 2016). Examining one representative stereocilium each from WT and  
193 *Pls1*<sup>-/-</sup> mice, we also found that that the actin-actin spacing was similar between genotypes, unlike what  
194 has been previously reported (Krey et al., 2016) (Fig. 4). WT actin-actin spacing was  $12.5 \pm 2.1$  nm  
195 (mean  $\pm$  SD; n=851), while *Pls1*<sup>-/-</sup> spacing was  $12.7 \pm 1.3$  nm (mean  $\pm$  SD; n=925). The order in the *Pls1*<sup>-/-</sup>  
196 stereocilia actin core was particularly apparent from this analysis (compare Fig. 4H to Fig. 4E).

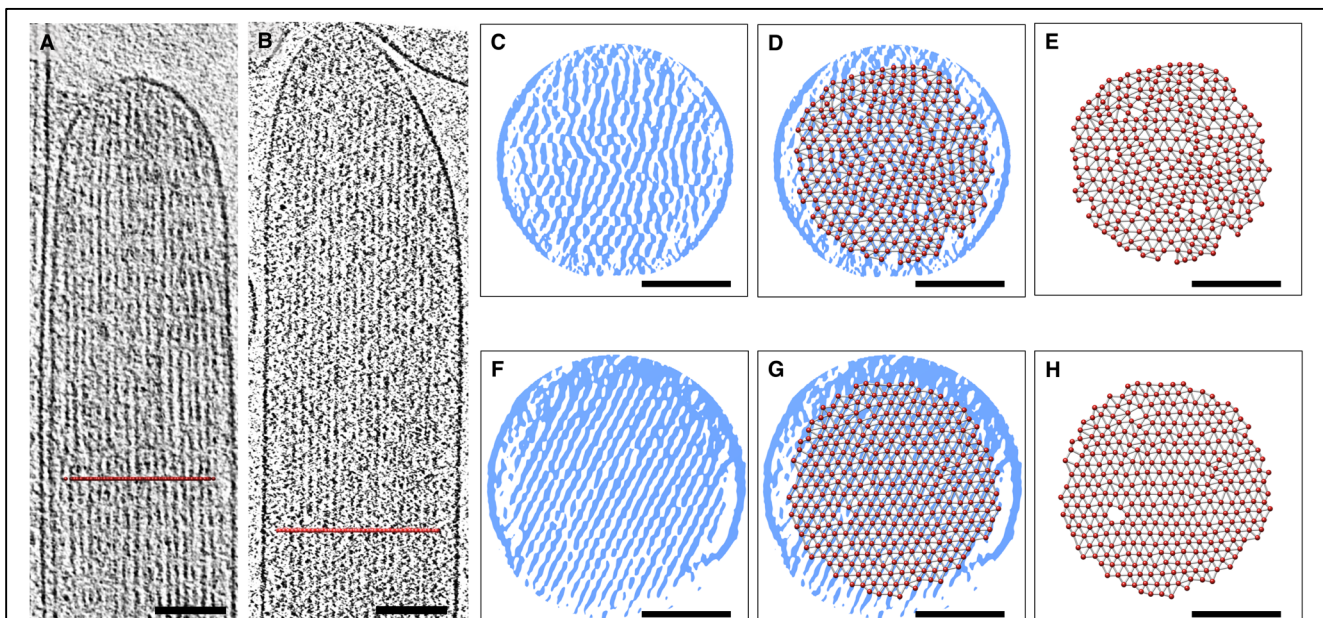

Figure 4. **Analysis of actin-actin spacing.** (A-B) Overview of a wildtype and *Pls1*<sup>-/-</sup> stereocilia, respectively, shown as a ~10 nm slab of 3D tomogram. Colored lines indicate position of transverse section used for measuring actin-actin spacing. (C,F) Central slices through WT and *Pls1*<sup>-/-</sup> stereocilia. (D,G) Central slices with actin filaments indicated with red circles. (E,H) Actin filaments are indicated by red circles and measurements between actin filaments (not position of crosslinkers) are indicated by lines. All scale bar = 100 nm.

197

198 We also observed a range of anomalies, including fusion of the membrane of adjacent stereocilia,  
199 stereocilia deformations, actin-core deformations, as well as membrane detachment in the tip and shaft

200 regions. Whether such structures existed prior to blotting or were an artifact of stereocilia blotting onto  
201 the grid surface remains unclear.

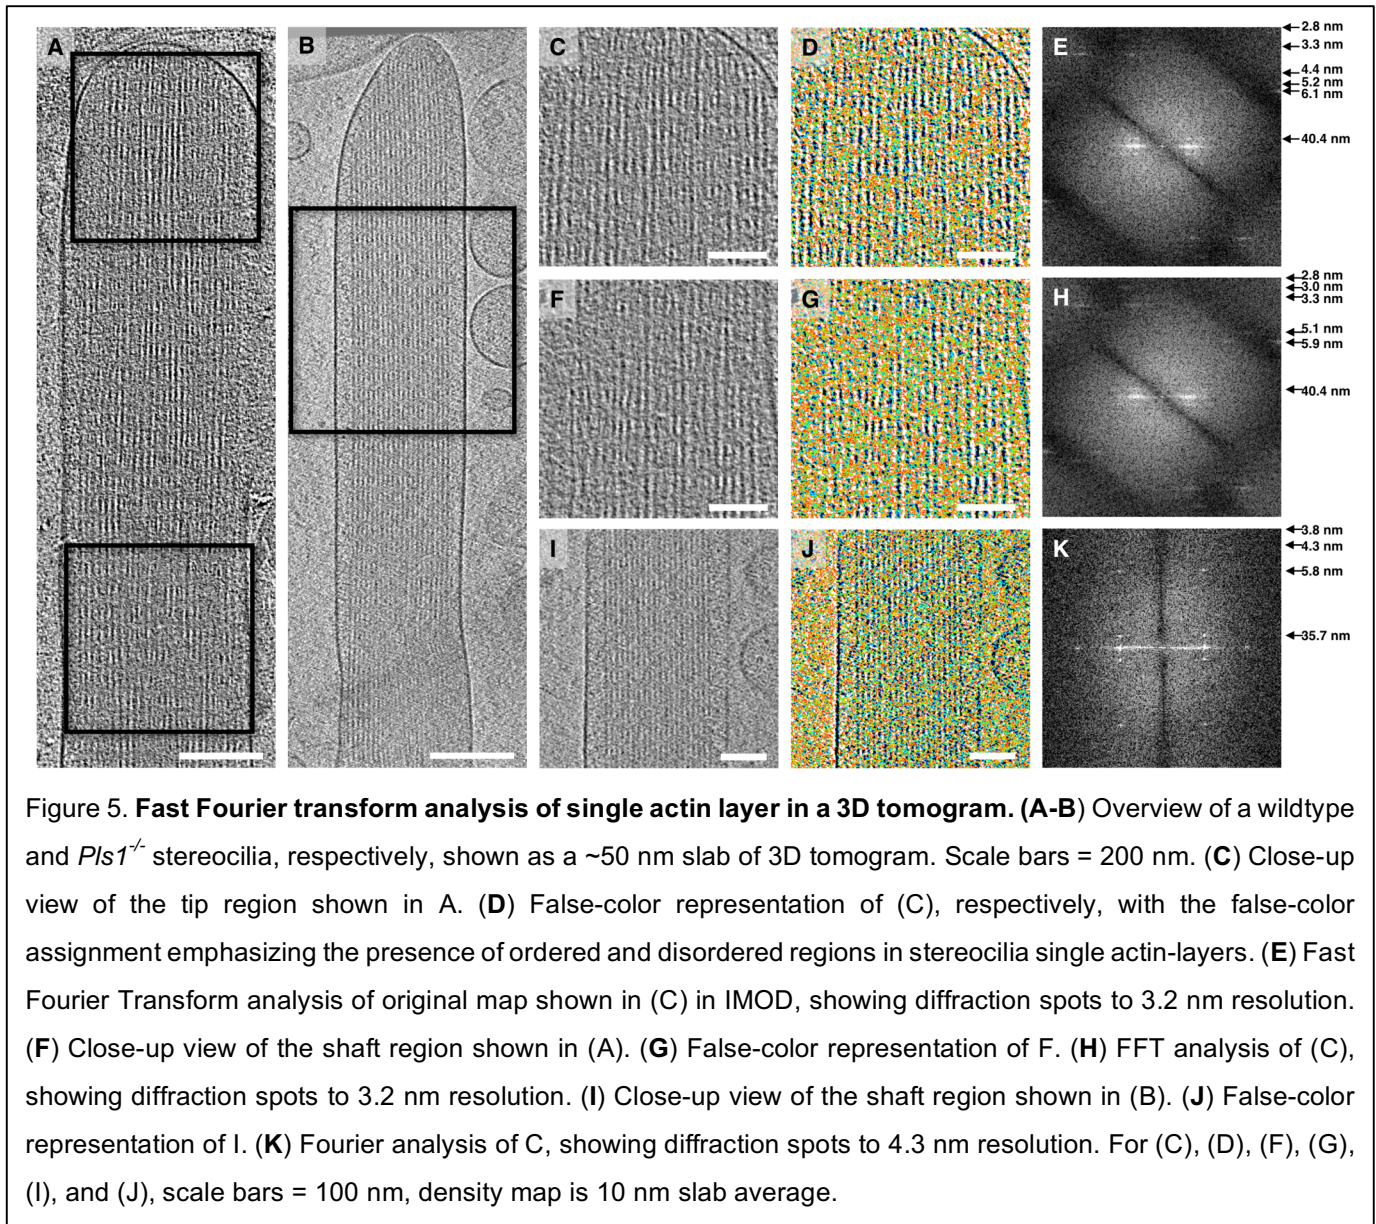

202

### 203 Actin filament order in stereocilia

204 To estimate the quality of our 3D reconstructions and their suitability for possible higher resolution  
205 reconstruction methods that exploit symmetry, such as the helical symmetry of the actin filaments or the  
206 expected hexagonal packing of the actin paracrystal for the *Pls1*<sup>-/-</sup> (Krey et al., 2016), we performed fast  
207 Fourier transform (FFT) analysis of mouse WT (Fig. 5A) and *Pls1*<sup>-/-</sup> (Fig. 5B) subregions of the  
208 tomographic reconstructions. While results are reported from 10 nm slabs, we found that analysis using  
209 smaller (6 or 8 nm) or larger (50 nm) slabs gave similar results. We used the Slicer tool in IMOD for

210 creating a 10 nm slab containing approximately one actin filament layer, based on previous findings using  
211 high-pressure frozen and fixed samples (Krey et al., 2016). We oriented the slabs manually and  
212 calculated the corresponding Fourier transform from a projection of the slab approximately in the direction  
213 of the beam (Z-projection). Subvolumes of 512 x 512 pixels are shown as grey-scale density maps (Fig.  
214 5C,F,I); we also used false-color representation, with blue for higher densities and yellow for lower  
215 densities (Fig. 5D,G,J), which emphasized actin filaments and the membrane. We examined three  
216 different regions of the stereocilia that were of particular interest: (1) the tip region (Fig 5C-E), which is  
217 expected to contain scaffolding for the transduction channel apparatus; (2) the shaft region ~1  $\mu\text{m}$  below  
218 the stereocilia tip in WT (Fig. 5F-H), and (3) a shaft region just below the tip in *Pls1<sup>-/-</sup>* (Fig. 5I-K). In some  
219 of our best samples, we see layer lines corresponding to well-established spacing of actin monomers  
220 within filaments, as well as row lines corresponding to actin-actin spacing, which is set by actin  
221 crosslinkers. These features suggest that our methods preserve well the long-range order of actin  
222 filaments, as well as protein structure, as is generally expected with vitrified samples. Improving further  
223 upon data collection and processing methods, such as recording data using electron-counting detectors  
224 with motion correction algorithms, could potentially allow us to gain a glimpse of the stereociliary protein  
225 machinery at near-atomic resolutions by applying subtomogram averaging or symmetry-based  
226 reconstruction methods. Despite all efforts to optimize orientation, however, imperfections of the actin  
227 paracrystal were evident, (Fig. 5C,D,F,G,I,J). FFT of the subregions are shown in Fig. 5E,H,K.  
228 Nonetheless, the presence of layer lines typical of actin filaments from in vitro experiments (Sukow and  
229 DeRosier, 1998; Volkman et al., 2001; Sukow and DeRosier, 2003) in some of our best datasets  
230 suggests that our sample preparation procedure preserved the actin filament structure to near-atomic  
231 resolution.

## 232 Discussion

233 By blotting stereocilia onto the support film of the electron microscope grid, we have adapted a sample  
234 preparation procedure that allows plunge-freezing and cryo-tomographic imaging of frozen-hydrated  
235 stereocilia. Blotting was carried out using poly-L-lysine-coated surfaces, which have been used  
236 previously for imaging isolated stereocilia (Neugebauer and Thurm, 1984; Shepherd et al., 1989; Hasson  
237 et al., 1997; Avenarius et al., 2017). Blotted stereocilia on grids were readily visualized by fluorescence  
238 labeling, which emphasized that proteins retained their native states, or by SEM, which permitted  
239 visualization of many stereocilia in large fields of view.

240 Ultrarapid plunge-freezing of stereocilia immobilizes all macromolecules within milliseconds in a close-  
241 to-native state. Such vitrified, unstained stereocilia were of ideal size and shape for electron tomographic  
242 analysis, and different regions of the stereocilia could be targeted for data collection. Cross-sectional  
243 views of the electron tomographic 3D volumes revealed that most stereocilia retained their cylindrical

244 shape over their entire lengths of 2-15  $\mu\text{m}$ . In mouse preparations, actin filaments showed clear  
245 hexagonal packing for *Pls1*<sup>-/-</sup> stereocilia, consistent with a previous report (Krey et al., 2016), but packing  
246 was less regular for WT stereocilia. The anisotropy of the data in the Z- versus the X,Y-direction, which  
247 is a direct result of limitations of data collection geometry, can be seen in stereocilia membrane cross-  
248 sectional views.

249 Stereocilia membranes typically reseal after isolation from epithelial tissue (Gillespie and Hudspeth,  
250 1991), and here we show that the membranes often formed a bulb-like structure at the taper end. We  
251 suggest that the membrane bending energy (Evans, 1974) prevents a tight radius of curvature around  
252 the taper and rootlet, particularly when the membrane detaches from the cytoskeleton.

253 The spacing between actin filaments was considerably larger than anticipated from earlier experiments  
254 using conventionally fixed stereocilia (Krey et al., 2016). Actin-actin spacing was greater both in WT (9.7  
255 nm in(Krey et al., 2016), 12.5 nm here) and *Pls1*<sup>-/-</sup> WT (7.9 and 12.7 nm). The spacing reported here is  
256 similar to that found in other actin arrays cross-linked with PLS1 (Volkman et al., 2001) and is consistent  
257 with the near-native preservation offered by cryopreservation.

258 Our method for stereocilia isolation and vitrification provides unprecedented preservation, which will allow  
259 future segmentation and model-building of the actin-filament core with its crosslinkers and actin-  
260 membrane connectors for the tip, shaft, taper and rootlet regions of stereocilia. Notably, Fourier analysis  
261 suggests a preservation of structural information of macromolecular complexes in stereocilia at 4-6 nm  
262 resolution. Data shown here were recorded in the integrated charge-detection mode, and thus were not  
263 subject to motion-correction; with new direct electron-counting detectors (Kuijper et al., 2015) and phase-  
264 plate technology (Danev and Baumeister, 2017), data quality is expected improve further. The  
265 methodology reported here demonstrates further progress towards developing a high-resolution model  
266 of a critical organelle.

## 267 **Acknowledgements**

268 MA acknowledges support by National Institutes of Health (NIH) grant P01 GM051487. PGBG was  
269 supported by NIH grants R01 DC011034 and P30 DC005983; DH was supported by NIH grant R01  
270 GM115972; and NV was supported by NIH grant P01 GM121203. NIH grants S10 OD012372 (DH) and  
271 P01 GM098412-S1 (DH) funded the purchase of the Titan Krios transmission electron microscope and  
272 Falcon II direct used for some data acquisition in this study. We received support from the OHSU  
273 Multiscale Microscopy Center, where additional data were acquired using a Titan Krios electron  
274 microscope.

## 275 **References**

- 276 Agulleiro JI, Fernandez JJ, 2011. Fast tomographic reconstruction on multicore computers.  
277 *Bioinformatics* 27, 582-583.
- 278 Avenarius MR, Krey JF, Dumont RA, Morgan CP, Benson CB, Vijayakumar S, Cunningham CL, Scheffer  
279 DI, Corey DP, Müller U, Jones SM, Barr-Gillespie PG, 2017. Heterodimeric capping protein is required  
280 for stereocilia length and width regulation. *J Cell Biol* 216, 3861-3881.
- 281 Baker LA, Grange M, Grünwald K, 2017. Electron cryo-tomography captures macromolecular  
282 complexes in native environments. *Curr Opin Struct Biol* 46, 149-156.
- 283 Chen H, Clyborne WK, Sedat JW, Agard DA, 1992. Priism: an integrated system for display and analysis  
284 of 3-D microscope images. *Proceedings of SPIE* 1660, 784-790.
- 285 Comolli LR, Duarte R, Baum D, Luef B, Downing KH, Larson DM, Csencsits R, Banfield JF, 2012. A  
286 portable cryo-plunger for on-site intact cryogenic microscopy sample preparation in natural  
287 environments. *Microsc Res Tech* 75, 829-836.
- 288 Danev R, Baumeister W, 2017. Expanding the boundaries of cryo-EM with phase plates. *Curr Opin Struct*  
289 *Biol* 46, 87-94.
- 290 Evans EA, 1974. Bending resistance and chemically induced moments in membrane bilayers. *Biophys J*  
291 14, 923-931.
- 292 Fettiplace R, Kim KX, 2014. The physiology of mechano-electrical transduction channels in hearing.  
293 *Physiol Rev* 94, 951-986.
- 294 Furness DN, Mahendrasingam S, Ohashi M, Fettiplace R, Hackney CM, 2008. The dimensions and  
295 composition of stereociliary rootlets in mammalian cochlear hair cells: comparison between high- and  
296 low-frequency cells and evidence for a connection to the lateral membrane. *J Neurosci* 28, 6342-  
297 6353.
- 298 Gillespie PG, Hudspeth AJ, 1991. High-purity isolation of bullfrog hair bundles and subcellular and  
299 topological localization of constituent proteins. *J Cell Biol* 112, 625-640.
- 300 Gillespie PG, Müller U, 2009. Mechanotransduction by hair cells: models, molecules, and mechanisms.  
301 *Cell* 139, 33-44.
- 302 Hackney CM, Fettiplace R, Furness DN, 1993. The functional morphology of stereociliary bundles on  
303 turtle cochlear hair cells. *Hear Res* 69, 163-175.
- 304 Hasson T, Gillespie PG, Garcia JA, MacDonald RB, Zhao Y, Yee AG, Mooseker MS, Corey DP, 1997.  
305 Unconventional myosins in inner-ear sensory epithelia. *J Cell Biol* 137, 1287-1307.
- 306 Hirokawa N, 1986. Cytoskeletal architecture of the chicken hair cells revealed with the quick-freeze,  
307 deep-etch technique. *Hear Res* 22, 41-54.
- 308 Hirokawa N, Tilney LG, 1982. Interactions between actin filaments and between actin filaments and  
309 membranes in quick-frozen and deeply etched hair cells of the chick ear. *J Cell Biol* 95, 249-261.
- 310 Hutchings J, Zanetti G, 2018. Fine details in complex environments: the power of cryo-electron  
311 tomography. *Biochem Soc Trans*
- 312 Jacobs RA, Hudspeth AJ, 1990. Ultrastructural correlates of mechano-electrical transduction in hair cells  
313 of the bullfrog's internal ear. *Cold Spring Harb Symp Quant Biol* 55, 547-561.

- 314 Jasnin M, Asano S, Gouin E, Hegerl R, Plitzko JM, Villa E, Cossart P, Baumeister W, 2013. Three-  
315 dimensional architecture of actin filaments in *Listeria monocytogenes* comet tails. *Proc Natl Acad Sci*  
316 *U S A* 110, 20521-20526.
- 317 Kachar B, Parakkal M, Kurc M, Zhao Y, Gillespie PG, 2000. High-resolution structure of hair-cell tip links.  
318 *Proc Natl Acad Sci USA* 97, 13336-13341.
- 319 Kremer JR, Mastronarde DN, McIntosh JR, 1996. Computer visualization of three-dimensional image  
320 data using IMOD. *J Struct Biol* 116, 71-76.
- 321 Krey JF, Krystofiak ES, Dumont RA, Vijayakumar S, Choi D, Rivero F, Kachar B, Jones SM, Barr-  
322 Gillespie PG, 2016. Platin 1 widens stereocilia by transforming actin filament packing from  
323 hexagonal to liquid. *J Cell Biol* 215, 467-482.
- 324 Kuijper M, van Hoften G, Janssen B, Geurink R, De Carlo S, Vos M, van Duinen G, van Haeringen B,  
325 Storms M, 2015. FEI's direct electron detector developments: Embarking on a revolution in cryo-TEM.  
326 *J Struct Biol* 192, 179-187.
- 327 McIntosh JR, O'Toole E, Morgan G, Austin J, Ulyanov E, Ataulakhanov F, Gudimchuk N, 2018.  
328 Microtubules grow by the addition of bent guanosine triphosphate tubulin to the tips of curved  
329 protofilaments. *J Cell Biol* 217, 2691-2708.
- 330 Neugebauer DC, Thurm U, 1984. Chemical dissection of stereovilli from fish inner ear reveals differences  
331 from intestinal microvilli. *J Neurocytol* 13, 797-808.
- 332 Oikonomou CM, Jensen GJ, 2017. Cellular Electron Cryotomography: Toward Structural Biology In Situ.  
333 *Annu Rev Biochem* 86, 873-896.
- 334 Roberts WM, Howard J, Hudspeth AJ, 1988. Hair cells: transduction, tuning, and transmission in the inner  
335 ear. *Annu Rev Cell Biol* 4, 63-92.
- 336 Shepherd GMG, Barres BA, Corey DP, 1989. "Bundle-blot" purification and initial protein characterization  
337 of hair cell stereocilia. *Proc Natl Acad Sci USA* 86, 4973-4977.
- 338 Shepherd GMG, P CD, Block SM, 1990. Actin cores of hair-cell stereocilia support myosin motility. *Proc*  
339 *Natl Acad Sci USA* 87, 8627-8631.
- 340 Shin JB, Krey JF, Hassan A, Metlagel Z, Tauscher AN, Pagana JM, Sherman NE, Jeffery ED, Spinelli  
341 KJ, Zhao H, Wilmarth PA, Choi D, David LL, Auer M, Barr-Gillespie PG, 2013. Molecular architecture  
342 of the chick vestibular hair bundle. *Nat Neurosci* 16, 365-374.
- 343 Sukow C, DeRosier D, 1998. How to analyze electron micrographs of rafts of actin filaments crosslinked  
344 by actin-binding proteins. *J Mol Biol* 284, 1039-1050.
- 345 Sukow C, DeRosier DJ, 2003. Order, disorder, and perturbations in actin-aldolase rafts. *Biophys J* 85,  
346 525-536.
- 347 Sun SY, Kaelber JT, Chen M, Dong X, Nematbakhsh Y, Shi J, Dougherty M, Lim CT, Schmid MF, Chiu  
348 W, He CY, 2018. Flagellum couples cell shape to motility in *Trypanosoma brucei*. *Proc Natl Acad Sci*  
349 *U S A* 115, E5916-E5925.
- 350 Turgay Y, Eibauer M, Goldman AE, Shimi T, Khayat M, Ben-Harush K, Dubrovsky-Gaupp A, Sapra KT,  
351 Goldman RD, Medalia O, 2017. The molecular architecture of lamins in somatic cells. *Nature* 543,  
352 261-264.
- 353 Volkmann N, DeRosier D, Matsudaira P, Hanein D, 2001. An atomic model of actin filaments cross-linked  
354 by fimbrin and its implications for bundle assembly and function. *J Cell Biol* 153, 947-956.

355

## 356 **Figure Legends**

357 **Figure 1. Stereocilia blotting from tissue surface onto electron microscopy support film. (A)**  
358 Schematic view of stereocilia blotting. Sensory epithelia are brought briefly into contact with the electron  
359 microscopy support film in dissection buffer solution, resulting in the transfer of hair bundles and  
360 stereocilia onto the EM grid support film. **(B)** Overview of the entire electron microscope grid imaged by  
361 SEM. Note the imprint of the tissue at the center. Scale bar = 500  $\mu\text{m}$ . **(C-D)** Close-up views of the center  
362 region of the grid imaged by SEM. Scale bars = 300  $\mu\text{m}$  (C) and 100  $\mu\text{m}$  (D). **(E-F)** Hair bundles labeled  
363 with Alexa 568-phalloidin. Scale bars = 50  $\mu\text{m}$  (E) and 20  $\mu\text{m}$  (F). **(G-H)** Low and intermediate resolution  
364 SEM images of stereocilia blotted into the grid bars. Scale bars = 10  $\mu\text{m}$  (G) and 1  $\mu\text{m}$  (H). **(I)** Higher  
365 resolution imaging of three adjacent stereocilia blotted onto an EM grid. Note that another stereocilium  
366 lays on top of the three-stereocilia monolayer. Scale bar = 1  $\mu\text{m}$ . **(J)** Four stereocilia deposited onto the  
367 support film spanning the grid squares. Note that some stereocilia appear straight, whereas others show  
368 significant deviations from the original straight rod shape. Scale bar = 1  $\mu\text{m}$ .

369 **Figure 2. Tilt series and 3D reconstruction of stereocilia. (A-C)** WT mouse utricle stereocilia shaft and  
370 tip region. **(D-F)** *Pls1*<sup>-/-</sup> mouse utricle stereocilia shaft and tip region. **(G,H)** WT mouse utricle stereocilia  
371 shaft and tip region. **(I,J)** Frog sacculus shaft and tip region. **(K,L)** *Pls1*<sup>-/-</sup> mouse utricle taper and rootlet  
372 region. (A) and (D) are zero-degree tilt series projection views; (B), (E), (G), (I), and (K) are central,  
373 longitudinal  $\sim 1$  nm slices through the 3D reconstructions; (C), (F), (H), (J), and (L) are  $\sim 50$  nm averaged  
374 cross-sectional views of stereocilia between the two parallel lines shown in (B), (E), (G), (I), and (K). Note  
375 the effect of the missing wedge on the 3D reconstruction as evidenced by anisotropic resolution in the z-  
376 direction (cross sections) compared to the x-y directions (longitudinal views). All scale bars = 200 nm.

377 **Figure 3. Tomograms of tip, shaft, and taper stereocilia regions. (A-B)** Central slice through  
378 stereocilia tip region of frog sacculus. **(C-E)** Central slice through stereocilia tip region of wildtype mouse  
379 utricle. **(F-H)** Central slice through stereocilia shaft region of *Pls1*<sup>-/-</sup> mouse utricle; note the presence of  
380 filamentous material near the tip in distinctly different orientation. **(I-J)** central slice through taper region  
381 of stereocilia from a *Pls1*<sup>-/-</sup> mouse utricle. All scale bars = 200 nm.

382 **Figure 4. Analysis of actin-actin spacing. (A-B)** Overview of a wildtype and *Pls1*<sup>-/-</sup> stereocilia,  
383 respectively, shown as a  $\sim 10$  nm slab of 3D tomogram. Colored lines indicate position of transverse  
384 section used for measuring actin-actin spacing. **(C,F)** Central slices through WT and *Pls1*<sup>-/-</sup> stereocilia.  
385 (D,G) Central slices with actin filaments indicated with red circles. **(E,H)** Actin filaments are indicated by  
386 red circles and measurements between actin filaments (not position of crosslinkers) are indicated by  
387 lines. All scale bars = 100 nm.

388 **Figure 5. Fast Fourier transform analysis of single actin layer in a 3D tomogram. (A-B)** Overview of  
389 a wildtype and *Pls1*<sup>-/-</sup> stereocilia, respectively, shown as a ~50 nm slab of 3D tomogram. Scale bars =  
390 200 nm. **(C)** Close-up view of the tip region shown in A. **(D)** False-color representation of (C), respectively,  
391 with the false-color assignment emphasizing the presence of ordered and disordered regions in  
392 stereocilia single actin-layers. **(E)** Fast Fourier Transform analysis of original map shown in (C) in IMOD,  
393 showing diffraction spots to 3.2 nm resolution. **(F)** Close-up view of the shaft region shown in (A). **(G)**  
394 False-color representation of F. **(H)** FFT analysis of (C), showing diffraction spots to 3.2 nm resolution.  
395 **(I)** Close-up view of the shaft region shown in (B). **(J)** False-color representation of I. **(K)** Fourier analysis  
396 of C, showing diffraction spots to 4.3 nm resolution. For (C), (D), (F), (G), (I), and (J), scale bars = 100 nm,  
397 density map is 10 nm slab average.

398
